# Supplementary material
Source: PubMed Central journal article supplement (PMC3060261)
Supplement: 1016030108_pnas.201016030SI.pdf [file 1016030108_pnas.201016030SI.pdf]

# Supporting Information

Soda et al. 10.1073/pnas.1016030108

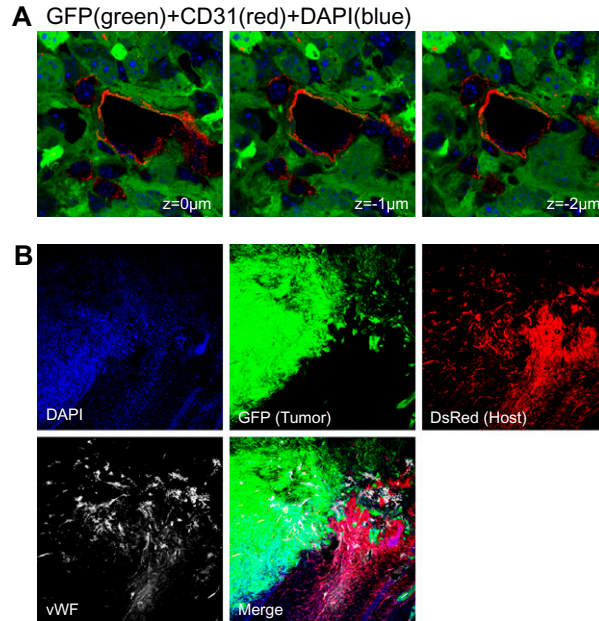

**Fig. S1.** Confocal images of GFP<sup>+</sup> ECs and a tumor that developed in a DsRed mouse. (A) Large images of a GBM vessel with GFP<sup>+</sup> and GFP<sup>-</sup> ECs. GFP<sup>+</sup> and GFP<sup>-</sup> ECs (CD31<sup>+</sup>) are forming vessels. Three images are results of a z-series assay (1- $\mu$ m distance). [Magnification: 189 $\times$  (63 $\times$  with 3 $\times$  electrical zoom).] (B) Infiltration of host cells into transplanted tumor. DsRed mouse host cells, including vWF<sup>+</sup> ECs, are infiltrating into the GFP<sup>+</sup> tumor. (Magnification: 10 $\times$ .)

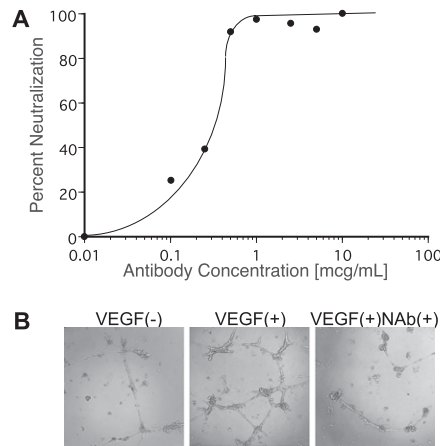

**Fig. S2.** Validation of VEGF NAb. (A) Titration of anti-VEGF NAb. Growth of HUVECs was examined in the presence of 100 ng/mL mVEGF and the indicated concentration of anti-VEGF NAb. The 50% neutralization dose was about 0.3  $\mu$ g/mL. (B) Inhibitory effect of anti-VEGF antibody on tube formation. Enhanced tube formation of HUVECs on Matrigel at 10 ng/mL VEGF was blocked by 1  $\mu$ g/mL anti-VEGF NAb.

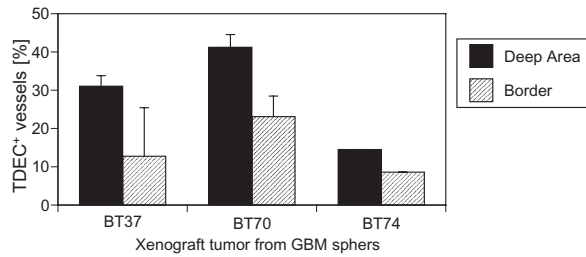

**Fig. S3.** Frequency of TDEC-forming vessels in total vessels in the xenograft tumors. Results are shown as mean  $\pm$  SD of each tumor generated from three different GBM spheres. Sample number indicates an individual patient.

**Table S1. Frequency of vessels containing GFP<sup>+</sup> ECs**

| Tumor | Size*, mm <sup>2</sup> | GFP <sup>+</sup> EC no./total (GFP <sup>+</sup> and GFP <sup>-</sup> )<br>EC no. (%) |                          |
|-------|------------------------|--------------------------------------------------------------------------------------|--------------------------|
|       |                        | Deep area <sup>†</sup>                                                               | Border area <sup>‡</sup> |
| 1     | 77.3                   | 35/107 (32.7)                                                                        | 15/118 (12.7)            |
| 2     | 50.4                   | 25/75 (33.3)                                                                         | 5/53 (9.4)               |
| 3     | 50.3                   | 42/111 (37.8)                                                                        | 10/102 (9.8)             |
| 4     | 50.1                   | 43/130 (33.1)                                                                        | 15/130 (11.5)            |
| 5     | 37.8                   | 7/69 (10.1)                                                                          | 2/66 (3.0)               |
| 6     | 23.2                   | 22/117 (18.8)                                                                        | 8/81 (9.9)               |
| 7     | 22.1                   | 7/109 (6.4)                                                                          | 2/100 (2.0)              |

\*Maximum diameter  $\times$  minimum diameter of the tumor.

<sup>†</sup>Greater than 500  $\mu$ m from the tumor border.

<sup>‡</sup>Less than 500  $\mu$ m from the tumor border.
